# Supplementary material for: Calculating and comparing codon usage values in rare disease genes highlights codon clustering with disease-and tissue- specific hierarchy
Source: PLoS One. 2022 Mar 31;17(3):e0265469. doi: 10.1371/journal.pone.0265469 (PMC8970475; doi:10.1371/journal.pone.0265469)
Supplement: S6 Table — Every gene is divided in a specific page (on the bottom) across species (on the top). (XLSX) [file pone.0265469.s008.xlsx]

## Sheet: ACTN3
	Species	Felis_catus	Equus_caballus	Bos_taurus	Rhinolophus_ferrumequinum	Mus_musculus	Canis_lupus	Microcebus_murinus	Galeopterus_variegatus	Callithrix_jacchus	Macaca_mulatta	Nomascus_leucogenys	Pongo_abelii	Gorilla_gorilla	Pan_troglodytes	Homo_sapiens
Amino Acid	Codon	XM_003993681.4	XM_005598181.3	XM_024987257.1	XM_033118856.1	NM_013456.2	XM_005631429.2	XM_020286452.1	XM_008578992.1	XM_002807373.4	XM_001109839.2	XM_012497446.1	XM_002821470.3	XM_004051591.2	XM_016921306.1	NM_001104.3
PHE	UUU	0.2	0.266667	0.266667	0.266667	0.266667	0.266667	0.266667	0.241379	0.241379	0.2	0.275862	0.258065	0.266667	0.266667	0.3
	UUC	0.8	0.733333	0.733333	0.733333	0.733333	0.733333	0.733333	0.758621	0.758621	0.8	0.724138	0.741935	0.733333	0.733333	0.7
LEU	UUA	0.0104167	0	0	0.0105263	0.0208333	0	0	0	0.0106383	0	0	0	0	0	0
	UUG	0.0729167	0.0707071	0.0594059	0.0631579	0.09375	0.0909091	0.010101	0.0416667	0.0531915	0.0631579	0.0618557	0.0638298	0.0631579	0.0631579	0.0625
	CUU	0.0208333	0.040404	0.019802	0.0631579	0.0416667	0.040404	0.010101	0.0416667	0.0319149	0.0421053	0.0309278	0.0212766	0.0421053	0.0421053	0.0416667
	CUC	0.21875	0.212121	0.188119	0.168421	0.208333	0.212121	0.222222	0.1875	0.202128	0.189474	0.195876	0.212766	0.189474	0.189474	0.1875
	CUA	0.0416667	0.020202	0.0594059	0.0421053	0.0729167	0.0808081	0.030303	0.03125	0.0425532	0.0631579	0.0412371	0.0531915	0.0631579	0.0631579	0.0520833
	CUG	0.635417	0.656566	0.673267	0.652632	0.5625	0.575758	0.727273	0.697917	0.659574	0.642105	0.670103	0.648936	0.642105	0.642105	0.65625
ILE	AUU	0.217391	0.0652174	0.152174	0.136364	0.319149	0.229167	0.133333	0.181818	0.166667	0.191489	0.214286	0.155556	0.23913	0.26087	0.255319
	AUC	0.76087	0.913043	0.847826	0.795455	0.638298	0.708333	0.866667	0.818182	0.770833	0.787234	0.761905	0.822222	0.717391	0.717391	0.723404
	AUA	0.0217391	0.0217391	0	0.0681818	0.0425532	0.0625	0	0	0.0625	0.0212766	0.0238095	0.0222222	0.0434783	0.0217391	0.0212766
VAL	GUU	0.159091	0.0851064	0.113636	0.0869565	0.142857	0.148936	0.106383	0.113636	0.133333	0.116279	0.104167	0.152174	0.116279	0.113636	0.116279
	GUC	0.159091	0.234043	0.159091	0.195652	0.214286	0.191489	0.191489	0.159091	0.111111	0.139535	0.1875	0.152174	0.162791	0.159091	0.139535
	GUA	0.0454545	0.0425532	0.0454545	0.0434783	0.166667	0.0851064	0.0425532	0.0909091	0.0666667	0.0697674	0.0833333	0.108696	0.0930233	0.0909091	0.0930233
	GUG	0.636364	0.638298	0.681818	0.673913	0.47619	0.574468	0.659574	0.636364	0.688889	0.674419	0.625	0.586957	0.627907	0.636364	0.651163
SER	UCU	0.0769231	0.0697674	0.097561	0.075	0.166667	0.0930233	0.0454545	0.0731707	0.0512821	0.1	0.12766	0.075	0.0769231	0.102564	0.0789474
	UCC	0.205128	0.232558	0.219512	0.275	0.261905	0.255814	0.25	0.243902	0.307692	0.25	0.234043	0.275	0.282051	0.25641	0.289474
	UCA	0.0769231	0.0697674	0.0487805	0.1	0.0714286	0.0930233	0.0681818	0.121951	0.128205	0.075	0.12766	0.1	0.102564	0.102564	0.105263
	UCG	0.179487	0.139535	0.146341	0.1	0.0952381	0.0697674	0.136364	0.097561	0.0769231	0.125	0.106383	0.125	0.102564	0.102564	0.0789474
PRO	CCU	0.133333	0.0909091	0.1	0.111111	0.103448	0.212121	0.0322581	0.0714286	0.137931	0.1	0.189189	0.206897	0.172414	0.172414	0.172414
	CCC	0.566667	0.545455	0.533333	0.592593	0.551724	0.454545	0.645161	0.571429	0.551724	0.6	0.513514	0.482759	0.517241	0.517241	0.517241
	CCA	0.133333	0.181818	0.133333	0.185185	0.275862	0.272727	0.225806	0.285714	0.172414	0.133333	0.135135	0.103448	0.137931	0.103448	0.103448
	CCG	0.166667	0.181818	0.233333	0.111111	0.0689655	0.0606061	0.0967742	0.0714286	0.137931	0.166667	0.162162	0.206897	0.172414	0.206897	0.206897
THR	ACU	0.128205	0.0731707	0.0232558	0.0769231	0.135135	0.125	0.153846	0.157895	0.128205	0.102564	0.204082	0.146341	0.15	0.175	0.15
	ACC	0.564103	0.609756	0.627907	0.666667	0.540541	0.6	0.564103	0.578947	0.666667	0.666667	0.530612	0.634146	0.65	0.6	0.625
	ACA	0.153846	0.146341	0.162791	0.153846	0.216216	0.175	0.153846	0.263158	0.179487	0.153846	0.142857	0.146341	0.15	0.2	0.175
	ACG	0.153846	0.170732	0.186047	0.102564	0.108108	0.1	0.128205	0	0.025641	0.0769231	0.122449	0.0731707	0.05	0.025	0.05
ALA	GCU	0.207317	0.209877	0.151163	0.180723	0.296296	0.277108	0.166667	0.268293	0.185185	0.13253	0.126582	0.148148	0.146341	0.146341	0.158537
	GCC	0.52439	0.469136	0.546512	0.506024	0.444444	0.457831	0.52381	0.402439	0.506173	0.578313	0.518987	0.555556	0.560976	0.560976	0.54878
	GCA	0.121951	0.135802	0.151163	0.168675	0.185185	0.192771	0.166667	0.256098	0.209877	0.180723	0.227848	0.185185	0.158537	0.158537	0.170732
	GCG	0.146341	0.185185	0.151163	0.144578	0.0740741	0.0722892	0.142857	0.0731707	0.0987654	0.108434	0.126582	0.111111	0.134146	0.134146	0.121951
TYR	UAU	0.285714	0.142857	0.238095	0.190476	0.285714	0.285714	0.0952381	0.3	0.25	0.333333	0.375	0.35	0.285714	0.285714	0.285714
	UAC	0.714286	0.857143	0.761905	0.809524	0.714286	0.714286	0.904762	0.7	0.75	0.666667	0.625	0.65	0.714286	0.714286	0.714286
STOP	UAA	0	0	0	0	0	0	0	0	1	0	0	0	0	0	0
	UAG	0	0	0	0	0	0	0	0	0	0	0	0	0	0	0
	UGA	1	1	1	1	1	1	1	1	0	1	1	1	1	1	1
HIS	CAU	0.05	0.136364	0.05	0.227273	0.285714	0.333333	0.1	0.2	0.1	0.15	0.136364	0.047619	0.05	0.1	0.05
	CAC	0.95	0.863636	0.95	0.772727	0.714286	0.666667	0.9	0.8	0.9	0.85	0.863636	0.952381	0.95	0.9	0.95
GLN	CAA	0.0909091	0.0350877	0.0689655	0.0925926	0.127273	0.142857	0.0535714	0.109091	0.0727273	0.0555556	0.0943396	0.0566038	0.0545455	0.037037	0.037037
	CAG	0.909091	0.964912	0.931034	0.907407	0.872727	0.857143	0.946429	0.890909	0.927273	0.944444	0.90566	0.943396	0.945455	0.962963	0.962963
ASN	AAU	0.125	0.15	0.128205	0.243902	0.341463	0.3	0.179487	0.307692	0.275	0.25641	0.2	0.128205	0.25641	0.205128	0.205128
	AAC	0.875	0.85	0.871795	0.756098	0.658537	0.7	0.820513	0.692308	0.725	0.74359	0.8	0.871795	0.74359	0.794872	0.794872
LYS	AAA	0.155556	0.152174	0.108696	0.195652	0.319149	0.177778	0.166667	0.0869565	0.195652	0.130435	0.152174	0.108696	0.170213	0.173913	0.170213
	AAG	0.844444	0.847826	0.891304	0.804348	0.680851	0.822222	0.833333	0.913043	0.804348	0.869565	0.847826	0.891304	0.829787	0.826087	0.829787
ASP	GAU	0.203704	0.18	0.185185	0.176471	0.254902	0.301887	0.0943396	0.196078	0.181818	0.259259	0.259259	0.283019	0.245283	0.245283	0.245283
	GAC	0.796296	0.82	0.814815	0.823529	0.745098	0.698113	0.90566	0.803922	0.818182	0.740741	0.740741	0.716981	0.754717	0.754717	0.754717
GLU	GAA	0.136364	0.0989011	0.157303	0.228261	0.208791	0.186813	0.134831	0.183908	0.136364	0.159091	0.166667	0.168539	0.170455	0.157303	0.159091
	GAG	0.863636	0.901099	0.842697	0.771739	0.791209	0.813187	0.865169	0.816092	0.863636	0.840909	0.833333	0.831461	0.829545	0.842697	0.840909
CYS	UGU	0.272727	0.0909091	0.272727	0.0909091	0.363636	0.0833333	0.333333	0.0909091	0.0833333	0.0833333	0.214286	0.166667	0.0833333	0.0833333	0.153846
	UGC	0.727273	0.909091	0.727273	0.909091	0.636364	0.916667	0.666667	0.909091	0.916667	0.916667	0.785714	0.833333	0.916667	0.916667	0.846154
ARG	CGU	0.0746269	0.0298507	0.0294118	0.106061	0.125	0.121212	0.0138889	0.0625	0.0909091	0.0597015	0.0416667	0.0606061	0.0606061	0.0746269	0.0454545
	CGC	0.328358	0.343284	0.338235	0.287879	0.25	0.272727	0.361111	0.328125	0.30303	0.313433	0.277778	0.318182	0.333333	0.313433	0.333333
	CGA	0.0895522	0.104478	0.0735294	0.121212	0.171875	0.136364	0.0694444	0.140625	0.136364	0.19403	0.166667	0.166667	0.151515	0.164179	0.166667
	CGG	0.358209	0.402985	0.441176	0.393939	0.28125	0.363636	0.402778	0.375	0.409091	0.313433	0.333333	0.363636	0.363636	0.343284	0.348485
SER	AGU	0.0769231	0.0697674	0.121951	0.075	0.119048	0.116279	0.0454545	0.0487805	0.102564	0.075	0.0851064	0.075	0.128205	0.102564	0.0789474
	AGC	0.384615	0.418605	0.365854	0.375	0.285714	0.372093	0.454545	0.414634	0.333333	0.375	0.319149	0.35	0.307692	0.333333	0.368421
ARG	AGA	0.0298507	0	0.0147059	0	0.03125	0	0	0.015625	0	0	0.0138889	0	0	0	0
	AGG	0.119403	0.119403	0.102941	0.0909091	0.140625	0.106061	0.152778	0.078125	0.0606061	0.119403	0.166667	0.0909091	0.0909091	0.104478	0.106061
GLY	GGU	0.122449	0.0847458	0.1	0.0666667	0.137255	0.125	0.0769231	0.15	0.142857	0.104167	0.134615	0.16	0.16	0.16	0.16
	GGC	0.44898	0.474576	0.45	0.488889	0.372549	0.392857	0.403846	0.375	0.452381	0.416667	0.365385	0.36	0.36	0.36	0.36
	GGA	0.102041	0.0847458	0.15	0.0888889	0.27451	0.160714	0.0769231	0.15	0.142857	0.104167	0.0769231	0.1	0.12	0.14	0.14
	GGG	0.326531	0.355932	0.3	0.355556	0.215686	0.321429	0.442308	0.325	0.261905	0.375	0.423077	0.38	0.36	0.34	0.34

## Sheet: MYLPF
	Species	Felis_catus	Equus_caballus	Bos_taurus	Rhinolophus_ferrumequinum	Mus_musculus	Canis_lupus	Microcebus_murinus	Galeopterus_variegatus	Callithrix_jacchus	Macaca_mulatta	Nomascus_leucogenys	Pongo_abelii	Gorilla_gorilla	Pan_troglodytes	Homo_sapiens
Amino Acid	Codon	XM_003998657.3	XM_001496195.5	NM_001075647.1	XM_033101686.1	NM_016754.5	XM_536899.5	XM_012764236.2	XM_008593870.1	XM_009009433.2	XM_015125940.1	XM_003280430.1	XM_009250640.1	XM_019012040.1	XM_016928813.1	NM_013292.4
PHE	UUU	0.0833333	0.25	0.25	0.333333	0.333333	0.0833333	0.0833333	0	0.166667	0.0833333	0	0.1	0.0833333	0	0
	UUC	0.916667	0.75	0.75	0.666667	0.666667	0.916667	0.916667	1	0.833333	0.916667	1	0.9	0.916667	1	1
LEU	UUA	0	0	0.111111	0	0	0	0	0	0.111111	0	0	0	0.0454545	0	0
	UUG	0	0	0	0.222222	0.111111	0	0	0	0	0.111111	0.111111	0.1	0.136364	0.111111	0.222222
	CUU	0.222222	0.111111	0	0.111111	0.333333	0.25	0.222222	0.222222	0.111111	0.111111	0.111111	0.2	0.0909091	0.111111	0.111111
	CUC	0.111111	0.222222	0.222222	0.222222	0.222222	0.125	0.222222	0.333333	0.222222	0.222222	0.222222	0.3	0.181818	0.222222	0.222222
	CUA	0.111111	0.111111	0.111111	0.111111	0	0.125	0.111111	0	0	0	0	0	0	0	0
	CUG	0.555556	0.555556	0.555556	0.333333	0.333333	0.5	0.444444	0.444444	0.555556	0.555556	0.555556	0.4	0.545455	0.555556	0.444444
ILE	AUU	0.1	0.2	0.3	0.1	0.2	0.3	0.2	0.3	0.2	0.1	0.1	0.111111	0.0833333	0.1	0.1
	AUC	0.9	0.8	0.7	0.9	0.8	0.7	0.8	0.7	0.7	0.8	0.8	0.777778	0.833333	0.8	0.8
	AUA	0	0	0	0	0	0	0	0	0.1	0.1	0.1	0.111111	0.0833333	0.1	0.1
VAL	GUU	0	0	0	0	0	0	0	0	0.1	0	0	0	0.0833333	0	0
	GUC	0.444444	0.444444	0.444444	0.3	0.444444	0.4	0.444444	0.444444	0.4	0.5	0.5	0.444444	0.416667	0.5	0.5
	GUA	0.222222	0.111111	0.222222	0.2	0.111111	0.1	0.222222	0.222222	0.1	0.1	0.1	0.111111	0.0833333	0.1	0.1
	GUG	0.333333	0.444444	0.333333	0.5	0.444444	0.5	0.333333	0.333333	0.4	0.4	0.4	0.444444	0.416667	0.4	0.4
SER	UCU	0	0	0	0	0	0	0	0	0	0	0	0	0	0	0
	UCC	0.6	0.6	0.5	0.333333	0.6	0.6	0.5	0.6	0.6	0.4	0.428571	0.5	0.5	0.5	0.5
	UCA	0	0	0	0.166667	0	0	0	0	0	0	0	0	0	0	0
	UCG	0	0	0	0	0	0	0	0	0	0	0	0	0	0	0
PRO	CCU	0.166667	0.333333	0.333333	0.166667	0	0.142857	0.428571	0.166667	0.333333	0.285714	0.333333	0.142857	0.4375	0.333333	0.333333
	CCC	0.666667	0.666667	0.666667	0.833333	0.5	0.714286	0.428571	0.833333	0.666667	0.571429	0.666667	0.714286	0.5	0.666667	0.666667
	CCA	0	0	0	0	0.333333	0	0.142857	0	0	0	0	0.142857	0	0	0
	CCG	0.166667	0	0	0	0.166667	0.142857	0	0	0	0.142857	0	0	0.0625	0	0
THR	ACU	0.2	0.2	0.444444	0.1	0.4	0.2	0.181818	0.4	0.3	0.272727	0.2	0.25	0.181818	0.181818	0.181818
	ACC	0.5	0.5	0.333333	0.6	0.4	0.5	0.545455	0.4	0.4	0.545455	0.5	0.416667	0.545455	0.545455	0.545455
	ACA	0	0.1	0.111111	0.1	0.1	0	0.0909091	0	0	0	0.1	0.166667	0.0909091	0.0909091	0.0909091
	ACG	0.3	0.2	0.111111	0.2	0.1	0.3	0.181818	0.2	0.3	0.181818	0.2	0.166667	0.181818	0.181818	0.181818
ALA	GCU	0.0666667	0.0666667	0.0666667	0.0714286	0.142857	0	0.0625	0.0714286	0.153846	0.153846	0	0	0.0714286	0	0
	GCC	0.466667	0.533333	0.6	0.5	0.357143	0.571429	0.5625	0.571429	0.615385	0.615385	0.75	0.583333	0.642857	0.75	0.75
	GCA	0.333333	0.333333	0.266667	0.285714	0.285714	0.357143	0.25	0.285714	0.230769	0.230769	0.166667	0.25	0.214286	0.166667	0.166667
	GCG	0.133333	0.0666667	0.0666667	0.142857	0.214286	0.0714286	0.125	0.0714286	0	0	0.0833333	0.166667	0.0714286	0.0833333	0.0833333
TYR	UAU	0	0	0	0	0	0	0	0	0	0	0	0	0	0.5	0
	UAC	1	1	1	1	1	1	1	1	1	1	1	1	1	0.5	1
STOP	UAA	0	0	0	0	0	0	1	0	0	0	0	0	0	0	0
	UAG	1	1	1	1	1	1	0	1	1	1	1	1	1	1	1
	UGA	0	0	0	0	0	0	0	0	0	0	0	0	0	0	0
HIS	CAU	1	1	1	1	1	1	1	1	0	0	0	0	0.4	0	0
	CAC	0	0	0	0	0	0	0	0	1	1	1	1	0.6	1	1
GLN	CAA	0.142857	0.125	0.142857	0	0	0	0	0	0	0	0	0	0.0833333	0	0
	CAG	0.857143	0.875	0.857143	1	1	1	1	1	1	1	1	1	0.916667	1	1
ASN	AAU	0.5	0.375	0.25	0.375	0.25	0.375	0.25	0.375	0.375	0.285714	0.375	0.25	0.222222	0.285714	0.285714
	AAC	0.5	0.625	0.75	0.625	0.75	0.625	0.75	0.625	0.625	0.714286	0.625	0.75	0.777778	0.714286	0.714286
LYS	AAA	0.0714286	0.0666667	0.235294	0.125	0.125	0.133333	0	0.125	0.0666667	0.0588235	0.0625	0.25	0.176471	0.125	0.125
	AAG	0.928571	0.933333	0.764706	0.875	0.875	0.866667	1	0.875	0.933333	0.941176	0.9375	0.75	0.823529	0.875	0.875
ASP	GAU	0.333333	0.25	0.2	0.266667	0.333333	0.266667	0.1875	0.2	0.2	0.2	0.133333	0.166667	0.2	0.2	0.2
	GAC	0.666667	0.75	0.8	0.733333	0.666667	0.733333	0.8125	0.8	0.8	0.8	0.866667	0.833333	0.8	0.8	0.8
GLU	GAA	0.2	0.285714	0.2	0.2	0.4	0.133333	0.153846	0	0.0666667	0.2	0.133333	0.142857	0.0625	0.0666667	0.0666667
	GAG	0.8	0.714286	0.8	0.8	0.6	0.866667	0.846154	1	0.933333	0.8	0.866667	0.857143	0.9375	0.933333	0.933333
CYS	UGU	0	0.5	0.5	0	0	0.5	0.5	0.5	0.5	0.5	0.5	0.5	0.5	0.5	0.5
	UGC	1	0.5	0.5	1	1	0.5	0.5	0.5	0.5	0.5	0.5	0.5	0.5	0.5	0.5
ARG	CGU	0.125	0.142857	0.166667	0.166667	0.166667	0.142857	0.166667	0.142857	0.142857	0.166667	0.142857	0.111111	0.111111	0.142857	0.142857
	CGC	0.25	0.285714	0.166667	0.333333	0	0.285714	0.333333	0.285714	0.285714	0.333333	0.285714	0.222222	0.222222	0.285714	0.285714
	CGA	0	0	0	0	0.166667	0	0	0	0	0	0	0	0	0	0
	CGG	0.125	0.142857	0.333333	0.166667	0.166667	0.142857	0.166667	0.142857	0.142857	0.166667	0.142857	0.111111	0.111111	0.142857	0.142857
SER	AGU	0.2	0	0.333333	0	0.2	0.2	0.25	0	0	0.4	0	0	0	0.333333	0
	AGC	0.2	0.4	0.166667	0.5	0.2	0.2	0.25	0.4	0.4	0.2	0.571429	0.5	0.5	0.166667	0.5
ARG	AGA	0.125	0.142857	0.166667	0.166667	0.166667	0.142857	0.166667	0.142857	0.142857	0.166667	0.142857	0.111111	0.111111	0.142857	0.142857
	AGG	0.375	0.285714	0.166667	0.166667	0.333333	0.285714	0.166667	0.285714	0.285714	0.166667	0.285714	0.444444	0.444444	0.285714	0.285714
GLY	GGU	0.153846	0.230769	0.153846	0.166667	0.153846	0.153846	0.230769	0.153846	0.153846	0.307692	0.25	0.272727	0.157895	0.230769	0.230769
	GGC	0.384615	0.384615	0.384615	0.416667	0.384615	0.384615	0.461538	0.461538	0.538462	0.384615	0.416667	0.454545	0.421053	0.461538	0.461538
	GGA	0.307692	0.230769	0.230769	0.166667	0.153846	0.230769	0.153846	0.230769	0.230769	0.230769	0.25	0.181818	0.263158	0.230769	0.230769
	GGG	0.153846	0.153846	0.230769	0.25	0.307692	0.230769	0.153846	0.153846	0.0769231	0.0769231	0.0833333	0.0909091	0.157895	0.0769231	0.0769231

## Sheet: TNNC2
	Species	Felis_catus	Equus_caballus	Bos_taurus	Rhinolophus_ferrumequinum	Mus_musculus	Canis_lupus	Microcebus_murinus	Galeopterus_variegatus	Callithrix_jacchus	Macaca_mulatta	Nomascus_leucogenys	Pongo_abelii	Gorilla_gorilla	Pan_troglodytes	Homo_sapiens
Amino Acid	Codon	XM_003983423.3	XM_005604669.3	NM_001076373.1	XM_033094963.1	NM_009394.2	XM_543023.5	XM_012742919.2	XM_008571601.1	XM_002747597.3	NM_001266550.2	XM_003253655.2	XM_009233684.1	XM_004062282.2	XM_001157246.4	NM_003279.2
PHE	UUU	0.1	0.2	0.1	0.2	0.5	0	0.1	0.2	0.2	0.3	0.2	0.333333	0.2	0.2	0.2
	UUC	0.9	0.8	0.9	0.8	0.5	1	0.9	0.8	0.8	0.7	0.8	0.666667	0.8	0.8	0.8
LEU	UUA	0	0	0	0	0	0	0	0	0	0	0	0	0	0	0
	UUG	0.222222	0.2	0.1	0.222222	0.333333	0.222222	0.222222	0.111111	0.222222	0.222222	0.222222	0.142857	0.222222	0.222222	0.222222
	CUU	0	0	0	0	0	0	0	0	0	0	0	0	0	0	0
	CUC	0.111111	0.2	0.2	0.111111	0.111111	0.111111	0.111111	0.111111	0.111111	0.111111	0.111111	0.142857	0.111111	0.111111	0.111111
	CUA	0	0	0	0	0.222222	0	0	0	0	0	0	0	0	0	0
	CUG	0.666667	0.6	0.7	0.666667	0.333333	0.666667	0.666667	0.777778	0.666667	0.666667	0.666667	0.714286	0.666667	0.666667	0.666667
ILE	AUU	0.2	0.111111	0.222222	0.222222	0.3	0.2	0.1	0.5	0.3	0.2	0.3	0.222222	0.2	0.2	0.2
	AUC	0.8	0.888889	0.777778	0.777778	0.7	0.8	0.9	0.5	0.7	0.8	0.7	0.777778	0.8	0.8	0.8
	AUA	0	0	0	0	0	0	0	0	0	0	0	0	0	0	0
VAL	GUU	0	0	0	0	0.285714	0	0	0	0	0	0.142857	0	0	0	0
	GUC	0.285714	0.285714	0.285714	0.375	0.142857	0.285714	0.375	0.285714	0.285714	0.285714	0.285714	0.2	0.285714	0.285714	0.285714
	GUA	0	0	0	0	0	0	0	0	0	0	0	0	0	0	0
	GUG	0.714286	0.714286	0.714286	0.625	0.571429	0.714286	0.625	0.714286	0.714286	0.714286	0.571429	0.8	0.714286	0.714286	0.714286
SER	UCU	0	0	0	0.125	0.142857	0	0.285714	0.142857	0.285714	0.285714	0.142857	0.166667	0.142857	0.142857	0.142857
	UCC	0.428571	0.428571	0.5	0.375	0.285714	0.428571	0.142857	0.428571	0.142857	0.142857	0.285714	0.333333	0.285714	0.285714	0.285714
	UCA	0	0	0	0	0	0	0	0	0	0	0	0	0	0	0
	UCG	0	0	0	0	0	0	0	0	0	0	0	0	0	0	0
PRO	CCU	0	0	0	0	0	0	0	0	0	0	0	0	0	0	0
	CCC	1	1	1	1	1	1	0.5	1	1	0.5	0.5	0.5	0.5	0.5	0.5
	CCA	0	0	0	0	0	0	0	0	0	0	0	0	0	0	0
	CCG	0	0	0	0	0	0	0.5	0	0	0.5	0.5	0.5	0.5	0.5	0.5
THR	ACU	0	0	0	0	0.166667	0	0	0.285714	0.166667	0	0.166667	0	0	0	0
	ACC	0.333333	0.333333	0.5	0.333333	0.333333	0.5	0.428571	0.285714	0.5	0.333333	0.333333	0.333333	0.333333	0.333333	0.333333
	ACA	0.166667	0.5	0.25	0.5	0.333333	0.166667	0.142857	0.142857	0.166667	0.166667	0.166667	0.166667	0.166667	0.166667	0.166667
	ACG	0.5	0.166667	0.25	0.166667	0.166667	0.333333	0.428571	0.285714	0.166667	0.5	0.333333	0.5	0.5	0.5	0.5
ALA	GCU	0.230769	0.384615	0.230769	0.25	0.615385	0.307692	0.166667	0.333333	0.384615	0.416667	0.416667	0.454545	0.416667	0.416667	0.416667
	GCC	0.461538	0.461538	0.538462	0.5	0.230769	0.384615	0.666667	0.333333	0.384615	0.416667	0.416667	0.454545	0.416667	0.416667	0.416667
	GCA	0.153846	0.0769231	0	0.0833333	0.0769231	0.0769231	0.0833333	0.0833333	0.153846	0.0833333	0.0833333	0.0909091	0.0833333	0.0833333	0.0833333
	GCG	0.153846	0.0769231	0.230769	0.166667	0.0769231	0.230769	0.0833333	0.25	0.0769231	0.0833333	0.0833333	0	0.0833333	0.0833333	0.0833333
TYR	UAU	0	0	0	0	0	0	0	0	0	0	0	0	0	0	0
	UAC	1	1	1	1	1	1	1	1	1	1	1	1	1	1	1
STOP	UAA	1	1	1	1	1	1	1	1	1	1	1	1	1	1	1
	UAG	0	0	0	0	0	0	0	0	0	0	0	0	0	0	0
	UGA	0	0	0	0	0	0	0	0	0	0	0	0	0	0	0
HIS	CAU	0	0	0	0	1	0	0	1	1	0	0	0	0	0	0
	CAC	1	1	1	1	0	1	1	0	0	1	1	1	1	1	1
GLN	CAA	0	0	0	0	0.2	0	0	0	0.2	0	0	0	0	0	0
	CAG	1	1	1	1	0.8	1	1	1	0.8	1	1	1	1	1	1
ASN	AAU	0	0	0	0	0	0	0	0.333333	0	0.666667	0.333333	0.333333	0.333333	0.333333	0.333333
	AAC	1	1	1	1	1	1	1	0.666667	1	0.333333	0.666667	0.666667	0.666667	0.666667	0.666667
LYS	AAA	0.333333	0.222222	0.222222	0.444444	0.444444	0.333333	0.2	0.333333	0.222222	0.222222	0.222222	0.333333	0.222222	0.333333	0.333333
	AAG	0.666667	0.777778	0.777778	0.555556	0.555556	0.666667	0.8	0.666667	0.777778	0.777778	0.777778	0.666667	0.777778	0.666667	0.666667
ASP	GAU	0.157895	0.263158	0.105263	0.315789	0.5	0.210526	0.0555556	0.263158	0.315789	0.210526	0.157895	0.1875	0.157895	0.157895	0.157895
	GAC	0.842105	0.736842	0.894737	0.684211	0.5	0.789474	0.944444	0.736842	0.684211	0.789474	0.842105	0.8125	0.842105	0.842105	0.842105
GLU	GAA	0.115385	0.0384615	0.0384615	0.0384615	0.222222	0.0769231	0.037037	0.153846	0.0769231	0.0384615	0.0384615	0.0526316	0.0769231	0.0769231	0.0769231
	GAG	0.884615	0.961538	0.961538	0.961538	0.777778	0.923077	0.962963	0.846154	0.923077	0.961538	0.961538	0.947368	0.923077	0.923077	0.923077
CYS	UGU	1	1	1	1	0	1	1	1	0	0	0	0	0	0	0
	UGC	0	0	0	0	1	0	0	0	1	1	1	0	1	1	1
ARG	CGU	0	0	0	0	0	0	0	0	0	0	0	0.2	0	0	0
	CGC	0.428571	0.428571	0.428571	0.428571	0.428571	0.428571	0.5	0.428571	0.428571	0.428571	0.428571	0.2	0.428571	0.428571	0.428571
	CGA	0	0	0.142857	0	0	0	0	0	0	0	0	0	0	0	0
	CGG	0.142857	0.142857	0.142857	0.142857	0.142857	0.142857	0.166667	0.142857	0.142857	0	0	0	0	0	0
SER	AGU	0	0	0	0	0	0	0	0	0.142857	0	0	0	0	0	0
	AGC	0.571429	0.571429	0.5	0.5	0.571429	0.571429	0.571429	0.428571	0.428571	0.571429	0.571429	0.5	0.571429	0.571429	0.571429
ARG	AGA	0	0	0	0.142857	0	0	0	0.142857	0	0	0	0	0.142857	0	0
	AGG	0.428571	0.428571	0.285714	0.285714	0.428571	0.428571	0.333333	0.285714	0.428571	0.571429	0.571429	0.6	0.428571	0.571429	0.571429
GLY	GGU	0.153846	0.153846	0	0.0769231	0.230769	0.0769231	0.230769	0.153846	0.230769	0.153846	0.153846	0.166667	0.153846	0.153846	0.153846
	GGC	0.615385	0.538462	0.769231	0.615385	0.461538	0.692308	0.538462	0.615385	0.461538	0.538462	0.615385	0.666667	0.615385	0.615385	0.615385
	GGA	0	0.0769231	0	0	0	0.0769231	0	0	0.0769231	0.0769231	0	0	0	0	0
	GGG	0.230769	0.230769	0.230769	0.307692	0.307692	0.153846	0.230769	0.230769	0.230769	0.230769	0.230769	0.166667	0.230769	0.230769	0.230769

## Sheet: ANKRD23
	Species	Felis_catus	Equus_caballus	Bos_taurus	Rhinolophus_ferrumequinum	Mus_musculus	Canis_lupus	Microcebus_murinus	Galeopterus_variegatus	Callithrix_jacchus	Macaca_mulatta	Nomascus_leucogenys	Pongo_abelii	Gorilla_gorilla	Pan_troglodytes	Homo_sapiens
Amino Acid	Codon	XM_003983947.3	XM_023618633.1	XM_002691137.6	XM_033100909.1	NM_153502.4	XM_538465.5	XM_012786950.2	XM_008567916.1	XM_017964072.1	XM_015112912.1	XM_003279227.3	XM_009235614.1	XM_004031449.2	XM_001151487.3	NM_144994.7
PHE	UUU	0	0.2	0.2	0.5	0.4	0.333333	0.333333	0.25	0.5	0.5	0.5	0	0.5	0.5	0.5
	UUC	1	0.8	0.8	0.5	0.6	0.666667	0.666667	0.75	0.5	0.5	0.5	1	0.5	0.5	0.5
LEU	UUA	0	0	0	0.0204082	0	0.027027	0	0	0.025	0	0	0	0	0	0
	UUG	0.25	0.0606061	0.234043	0.142857	0.179487	0.108108	0.225	0.121951	0.225	0.2	0.205128	0.0740741	0.179487	0.179487	0.205128
	CUU	0.05	0.0909091	0.0638298	0.102041	0.0512821	0	0.05	0.0731707	0.025	0.075	0.0512821	0.037037	0.0512821	0.0512821	0.0512821
	CUC	0.125	0.151515	0.0851064	0.163265	0.153846	0.135135	0.125	0.121951	0.1	0.1	0.102564	0.148148	0.102564	0.102564	0.102564
	CUA	0.05	0.0606061	0.0425532	0.0612245	0.0512821	0.027027	0.075	0	0.025	0	0.025641	0.0740741	0.025641	0.025641	0.025641
	CUG	0.525	0.636364	0.574468	0.510204	0.564103	0.702703	0.525	0.682927	0.6	0.625	0.615385	0.666667	0.641026	0.641026	0.615385
ILE	AUU	0.375	0.125	0.333333	0.142857	0.333333	0.142857	0.375	0.5	0.285714	0.428571	0.428571	0.2	0.285714	0.285714	0.285714
	AUC	0.625	0.75	0.555556	0.857143	0.555556	0.857143	0.625	0.5	0.571429	0.571429	0.571429	0.8	0.714286	0.714286	0.714286
	AUA	0	0.125	0.111111	0	0.111111	0	0	0	0.142857	0	0	0	0	0	0
VAL	GUU	0.227273	0.238095	0.181818	0.0909091	0.157895	0.15	0.210526	0.272727	0.230769	0.15	0.166667	0	0.190476	0.181818	0.173913
	GUC	0.136364	0.190476	0.181818	0.242424	0.157895	0.1	0.105263	0.136364	0.115385	0.1	0.125	0.0833333	0.0952381	0.0909091	0.130435
	GUA	0.0909091	0.0952381	0.0454545	0.0606061	0.105263	0.05	0.0526316	0.0909091	0.153846	0.1	0.0416667	0	0.047619	0.0454545	0.0434783
	GUG	0.545455	0.47619	0.590909	0.606061	0.578947	0.7	0.631579	0.5	0.5	0.65	0.666667	0.916667	0.666667	0.681818	0.652174
SER	UCU	0.166667	0.153846	0.190476	0.04	0.111111	0	0.2	0.0909091	0.133333	0	0	0.25	0	0	0
	UCC	0.166667	0.153846	0.142857	0.2	0.333333	0.375	0.2	0.272727	0.133333	0.333333	0.25	0	0.2	0.125	0.222222
	UCA	0.166667	0.0769231	0.0952381	0.2	0	0	0	0	0.266667	0	0	0	0	0	0
	UCG	0	0	0.047619	0	0	0.125	0	0.0909091	0	0	0	0	0	0	0
PRO	CCU	0.363636	0.294118	0.2	0.454545	0.375	0.333333	0.285714	0.307692	0.4	0.235294	0.294118	0.166667	0.352941	0.352941	0.375
	CCC	0.545455	0.470588	0.5	0.424242	0.5	0.466667	0.642857	0.615385	0.5	0.647059	0.529412	0.666667	0.529412	0.529412	0.5
	CCA	0	0.176471	0.2	0.0909091	0.125	0.0666667	0.0714286	0.0769231	0.05	0.0588235	0.0588235	0	0	0	0
	CCG	0.0909091	0.0588235	0.1	0.030303	0	0.133333	0	0	0.05	0.0588235	0.117647	0.166667	0.117647	0.117647	0.125
THR	ACU	0.166667	0	0.266667	0.277778	0.1	0	0.444444	0.1	0.1	0.1	0.111111	0.1	0	0	0
	ACC	0.333333	0.2	0.333333	0.222222	0.2	0.6	0.222222	0.3	0.5	0.6	0.444444	0.5	0.555556	0.6	0.6
	ACA	0.333333	0.6	0.133333	0.277778	0.4	0.3	0.333333	0.4	0.3	0.2	0.333333	0.3	0.333333	0.3	0.3
	ACG	0.166667	0.2	0.266667	0.222222	0.3	0.1	0	0.2	0.1	0.1	0.111111	0.1	0.111111	0.1	0.1
ALA	GCU	0.242424	0.214286	0.238095	0.266667	0.3	0.305556	0.225806	0.25	0.28125	0.193548	0.214286	0.166667	0.2	0.2	0.2
	GCC	0.545455	0.464286	0.52381	0.466667	0.333333	0.527778	0.483871	0.5	0.5	0.548387	0.571429	0.541667	0.566667	0.566667	0.566667
	GCA	0.181818	0.142857	0.142857	0.2	0.266667	0.111111	0.258065	0.178571	0.15625	0.129032	0.142857	0.166667	0.166667	0.133333	0.133333
	GCG	0.030303	0.178571	0.0952381	0.0666667	0.1	0.0555556	0.0322581	0.0714286	0.0625	0.129032	0.0714286	0.125	0.0666667	0.1	0.1
TYR	UAU	0.25	0	0.25	0.333333	0.666667	0	0.5	0	0	0	0.25	0.25	0.25	0.25	0.25
	UAC	0.75	1	0.75	0.666667	0.333333	1	0.5	1	1	1	0.75	0.75	0.75	0.75	0.75
STOP	UAA	0	0	0	0	0	0	0	0	0	0	0	0	0	0	0
	UAG	1	0	0	0	0	0	0	0	0	0	0	0	0	0	0
	UGA	0	1	1	1	1	1	1	1	1	1	1	1	1	1	1
HIS	CAU	0.466667	0.272727	0.266667	0.235294	0.2	0.5	0.5	0.538462	0.4375	0.357143	0.266667	0.230769	0.266667	0.266667	0.266667
	CAC	0.533333	0.727273	0.733333	0.764706	0.8	0.5	0.5	0.461538	0.5625	0.642857	0.733333	0.769231	0.733333	0.733333	0.733333
GLN	CAA	0.166667	0.333333	0.0526316	0.0454545	0.1875	0.117647	0.176471	0.210526	0.1875	0.1875	0.133333	0	0.133333	0.133333	0.133333
	CAG	0.833333	0.666667	0.947368	0.954545	0.8125	0.882353	0.823529	0.789474	0.8125	0.8125	0.866667	1	0.866667	0.866667	0.866667
ASN	AAU	0.3	0.3	0.0909091	0.111111	0.3	0.125	0.272727	0.333333	0.636364	0.1	0.25	0.285714	0.2	0.272727	0.272727
	AAC	0.7	0.7	0.909091	0.888889	0.7	0.875	0.727273	0.666667	0.363636	0.9	0.75	0.714286	0.8	0.727273	0.727273
LYS	AAA	0.380952	0.347826	0.3	0.352941	0.47619	0.315789	0.25	0.2	0.380952	0.35	0.333333	0.2	0.380952	0.333333	0.333333
	AAG	0.619048	0.652174	0.7	0.647059	0.52381	0.684211	0.75	0.8	0.619048	0.65	0.666667	0.8	0.619048	0.666667	0.666667
ASP	GAU	0.277778	0.0714286	0.2	0	0.222222	0.157895	0.176471	0.315789	0.210526	0.105263	0.176471	0.0769231	0.111111	0.111111	0.117647
	GAC	0.722222	0.928571	0.8	1	0.777778	0.842105	0.823529	0.684211	0.789474	0.894737	0.823529	0.923077	0.888889	0.888889	0.882353
GLU	GAA	0.35	0.384615	0.307692	0.333333	0.363636	0.3	0.409091	0.428571	0.434783	0.35	0.333333	0.125	0.35	0.35	0.35
	GAG	0.65	0.615385	0.692308	0.666667	0.636364	0.7	0.590909	0.571429	0.565217	0.65	0.666667	0.875	0.65	0.65	0.65
CYS	UGU	0.75	0.125	0.363636	0.583333	0.4	0.571429	0.5	0.285714	0.333333	0.2	0.4	0.333333	0.333333	0.4	0.4
	UGC	0.25	0.875	0.636364	0.416667	0.6	0.428571	0.5	0.714286	0.666667	0.8	0.6	0.666667	0.666667	0.6	0.6
ARG	CGU	0.0384615	0.0666667	0	0.0909091	0.0769231	0.0645161	0.148148	0.04	0.0740741	0.0344828	0	0.0769231	0	0	0
	CGC	0.192308	0.0666667	0.2	0.113636	0.153846	0.16129	0.0740741	0.2	0.111111	0.172414	0.192308	0.307692	0.153846	0.178571	0.185185
	CGA	0.0769231	0.133333	0.0857143	0.113636	0.115385	0.0322581	0.0740741	0.12	0.037037	0.0689655	0.0769231	0.0769231	0.115385	0.107143	0.111111
	CGG	0.269231	0.333333	0.2	0.181818	0.230769	0.322581	0.259259	0.2	0.185185	0.344828	0.346154	0.461538	0.346154	0.321429	0.333333
SER	AGU	0	0.153846	0.285714	0.28	0.222222	0.125	0.3	0.272727	0.2	0.333333	0.375	0	0.4	0.375	0.333333
	AGC	0.5	0.461538	0.238095	0.28	0.333333	0.375	0.3	0.272727	0.266667	0.333333	0.375	0.75	0.4	0.5	0.444444
ARG	AGA	0.269231	0.266667	0.228571	0.204545	0.269231	0.193548	0.222222	0.24	0.444444	0.206897	0.230769	0	0.230769	0.25	0.222222
	AGG	0.153846	0.133333	0.285714	0.295455	0.153846	0.225806	0.222222	0.2	0.148148	0.172414	0.153846	0.0769231	0.153846	0.142857	0.148148
GLY	GGU	0.0909091	0.0833333	0.103448	0.0888889	0.0416667	0.0869565	0.190476	0.130435	0.1	0.0952381	0.0909091	0.142857	0.0909091	0.0952381	0.0909091
	GGC	0.227273	0.208333	0.275862	0.288889	0.333333	0.173913	0.142857	0.173913	0.3	0.190476	0.227273	0.214286	0.227273	0.238095	0.227273
	GGA	0.5	0.5	0.241379	0.355556	0.458333	0.521739	0.52381	0.521739	0.35	0.428571	0.409091	0.285714	0.409091	0.380952	0.409091
	GGG	0.181818	0.208333	0.37931	0.266667	0.166667	0.217391	0.142857	0.173913	0.25	0.285714	0.272727	0.357143	0.272727	0.285714	0.272727

## Sheet: LBX1
	Species	Felis_catus	Equus_caballus	Bos_taurus	Rhinolophus_ferrumequinum	Mus_musculus	Canis_lupus	Microcebus_murinus	Galeopterus_variegatus	Callithrix_jacchus	Macaca_mulatta	Nomascus_leucogenys	Pongo_abelii	Gorilla_gorilla	Pan_troglodytes	Homo_sapiens
Amino Acid	Codon	XM_023240848.1	XM_001499876.5	NM_001192814.2	XM_033129835.1	XM_006526722.3	XM_543979.5	XM_012769173.2	-	XM_002756537.3	NM_001194466.2	XM_003255363.1	XM_002821079.2	XM_004049981.2	XM_009459111.2	NM_006562.4
PHE	UUU	0.333333	0.5	0.5	0.5	0.5	0.333333	0.333333	-	0.5	0.5	0.5	0.5	0.5	0.5	0.5
	UUC	0.666667	0.5	0.5	0.5	0.5	0.666667	0.666667	-	0.5	0.5	0.5	0.5	0.5	0.5	0.5
LEU	UUA	0	0	0	0	0	0	0	-	0	0	0	0	0	0	0
	UUG	0.0666667	0.0666667	0.0666667	0.0666667	0.133333	0.0666667	0.1	-	0.0666667	0.0666667	0.0666667	0.1	0.0666667	0.0666667	0.0666667
	CUU	0	0	0.133333	0	0	0	0.0333333	-	0.0333333	0	0	0	0	0	0
	CUC	0.333333	0.3	0.266667	0.3	0.3	0.333333	0.266667	-	0.266667	0.3	0.266667	0.3	0.3	0.3	0.3
	CUA	0	0	0	0	0.0666667	0	0.0333333	-	0.0333333	0.0333333	0.0333333	0.0333333	0.0333333	0.0333333	0.0333333
	CUG	0.6	0.633333	0.533333	0.633333	0.5	0.6	0.566667	-	0.6	0.6	0.633333	0.566667	0.6	0.6	0.6
ILE	AUU	0	0	0.125	0	0.125	0	0	-	0	0	0	0	0	0	0
	AUC	1	1	0.875	1	0.875	1	1	-	1	1	1	1	1	1	1
	AUA	0	0	0	0	0	0	0	-	0	0	0	0	0	0	0
VAL	GUU	0	0.142857	0	0	0	0	0	-	0.25	0.125	0.125	0.125	0.125	0.125	0.125
	GUC	0.428571	0.285714	0.428571	0.428571	0.428571	0.428571	0.428571	-	0.25	0.375	0.375	0.375	0.375	0.375	0.375
	GUA	0	0	0	0	0	0	0	-	0.125	0.125	0.125	0.125	0.125	0.125	0.125
	GUG	0.571429	0.571429	0.571429	0.571429	0.571429	0.571429	0.571429	-	0.375	0.375	0.375	0.375	0.375	0.375	0.375
SER	UCU	0.173913	0.125	0.125	0.0869565	0.166667	0.130435	0.12	-	0.130435	0.166667	0.130435	0.125	0.130435	0.130435	0.130435
	UCC	0.217391	0.25	0.208333	0.26087	0.166667	0.217391	0.24	-	0.217391	0.208333	0.173913	0.166667	0.173913	0.173913	0.173913
	UCA	0.0434783	0	0.0416667	0.0434783	0.0833333	0.0434783	0.08	-	0	0	0	0	0	0	0
	UCG	0.217391	0.291667	0.25	0.26087	0.25	0.26087	0.2	-	0.304348	0.291667	0.347826	0.333333	0.347826	0.347826	0.347826
PRO	CCU	0.125	0.0833333	0.136364	0.125	0.130435	0.130435	0.166667	-	0.130435	0.173913	0.125	0.166667	0.166667	0.173913	0.181818
	CCC	0.25	0.333333	0.227273	0.25	0.304348	0.304348	0.291667	-	0.26087	0.217391	0.208333	0.25	0.25	0.217391	0.227273
	CCA	0.0416667	0.0416667	0.0909091	0.208333	0.130435	0.0869565	0.0833333	-	0.130435	0.0869565	0.125	0.0833333	0.125	0.0869565	0.0909091
	CCG	0.583333	0.541667	0.545455	0.416667	0.434783	0.478261	0.458333	-	0.478261	0.521739	0.541667	0.5	0.458333	0.521739	0.5
THR	ACU	0.181818	0.0909091	0.153846	0.0833333	0.0909091	0.181818	0.0833333	-	0.0833333	0.166667	0.0833333	0.0833333	0.0833333	0.0833333	0.0833333
	ACC	0.636364	0.636364	0.538462	0.583333	0.545455	0.636364	0.666667	-	0.5	0.416667	0.5	0.5	0.5	0.5	0.5
	ACA	0.0909091	0	0.230769	0	0	0.0909091	0	-	0.0833333	0.0833333	0.0833333	0.0833333	0.0833333	0.0833333	0.0833333
	ACG	0.0909091	0.272727	0.0769231	0.333333	0.363636	0.0909091	0.25	-	0.333333	0.333333	0.333333	0.333333	0.333333	0.333333	0.333333
ALA	GCU	0.0606061	0.09375	0.121212	0.09375	0.0967742	0.0606061	0.129032	-	0.0625	0.09375	0.0625	0.125	0.0625	0.0606061	0.0606061
	GCC	0.454545	0.40625	0.424242	0.46875	0.451613	0.484848	0.387097	-	0.53125	0.5	0.53125	0.5	0.53125	0.545455	0.545455
	GCA	0.030303	0.0625	0.0606061	0.0625	0.0967742	0.0606061	0.0645161	-	0.03125	0.03125	0.03125	0.03125	0.03125	0.030303	0.030303
	GCG	0.454545	0.4375	0.393939	0.375	0.354839	0.393939	0.419355	-	0.375	0.375	0.375	0.34375	0.375	0.363636	0.363636
TYR	UAU	0	0.25	0.25	0	0	0	0	-	0.25	0.25	0.25	0.25	0.25	0.25	0.25
	UAC	1	0.75	0.75	1	1	1	1	-	0.75	0.75	0.75	0.75	0.75	0.75	0.75
STOP	UAA	0	0	0	0	0	0	0	-	0	0	0	0	0	0	0
	UAG	0	0	0	0	0	0	0	-	0	0	0	0	0	0	0
	UGA	1	1	1	1	1	1	1	-	1	1	1	1	1	1	1
HIS	CAU	0	0	0	0	0	0	0	-	0	0	0	0	0	0	0
	CAC	1	1	1	1	1	1	1	-	1	1	1	1	1	1	1
GLN	CAA	0.0588235	0.117647	0.0588235	0.0588235	0.0588235	0.0555556	0.0588235	-	0.222222	0.117647	0.117647	0.117647	0.117647	0.125	0.117647
	CAG	0.941176	0.882353	0.941176	0.941176	0.941176	0.944444	0.941176	-	0.777778	0.882353	0.882353	0.882353	0.882353	0.875	0.882353
ASN	AAU	0.142857	0.142857	0.428571	0.142857	0.142857	0.142857	0.142857	-	0.142857	0.142857	0.142857	0.142857	0.142857	0.142857	0.142857
	AAC	0.857143	0.857143	0.571429	0.857143	0.857143	0.857143	0.857143	-	0.857143	0.857143	0.857143	0.857143	0.857143	0.857143	0.857143
LYS	AAA	0.0555556	0.166667	0.166667	0.0555556	0.222222	0.0555556	0.0555556	-	0.166667	0.0555556	0.0555556	0.0555556	0.0555556	0.0526316	0.0526316
	AAG	0.944444	0.833333	0.833333	0.944444	0.777778	0.944444	0.944444	-	0.833333	0.944444	0.944444	0.944444	0.944444	0.947368	0.947368
ASP	GAU	0.176471	0.176471	0.117647	0.176471	0.294118	0.294118	0.176471	-	0.176471	0.117647	0.117647	0.117647	0.166667	0.117647	0.117647
	GAC	0.823529	0.823529	0.882353	0.823529	0.705882	0.705882	0.823529	-	0.823529	0.882353	0.882353	0.882353	0.833333	0.882353	0.882353
GLU	GAA	0.238095	0.238095	0.238095	0.285714	0.190476	0.238095	0.238095	-	0.333333	0.285714	0.333333	0.285714	0.3	0.285714	0.285714
	GAG	0.761905	0.761905	0.761905	0.714286	0.809524	0.761905	0.761905	-	0.666667	0.714286	0.666667	0.714286	0.7	0.714286	0.714286
CYS	UGU	0	0	0	0.25	0.25	0	0	-	0	0	0	0.25	0	0	0
	UGC	1	1	1	0.75	0.75	1	1	-	1	1	1	0.75	1	1	1
ARG	CGU	0.0555556	0	0	0	0	0	0	-	0.0555556	0	0	0	0	0	0
	CGC	0.277778	0.388889	0.388889	0.388889	0.368421	0.333333	0.388889	-	0.333333	0.333333	0.388889	0.388889	0.388889	0.388889	0.388889
	CGA	0.166667	0.0555556	0.111111	0.111111	0.105263	0.111111	0.111111	-	0.0555556	0.111111	0.0555556	0.0555556	0.0555556	0.0555556	0.0555556
	CGG	0.333333	0.388889	0.277778	0.277778	0.315789	0.388889	0.333333	-	0.333333	0.388889	0.388889	0.388889	0.388889	0.388889	0.388889
SER	AGU	0.0434783	0.0416667	0.0416667	0.0869565	0.0416667	0.0434783	0.04	-	0.0869565	0.0833333	0.0869565	0.0833333	0.0869565	0.0434783	0.0434783
	AGC	0.304348	0.291667	0.333333	0.26087	0.291667	0.304348	0.32	-	0.26087	0.25	0.26087	0.291667	0.26087	0.304348	0.304348
ARG	AGA	0.0555556	0.0555556	0.0555556	0.0555556	0.0526316	0.0555556	0.0555556	-	0.0555556	0.0555556	0.0555556	0.0555556	0.0555556	0.0555556	0.0555556
	AGG	0.111111	0.111111	0.166667	0.166667	0.157895	0.111111	0.111111	-	0.166667	0.111111	0.111111	0.111111	0.111111	0.111111	0.111111
GLY	GGU	0.0416667	0.0416667	0	0.125	0.115385	0	0.130435	-	0.0434783	0.0434783	0.0434783	0.0909091	0.0434783	0.0869565	0.0869565
	GGC	0.666667	0.625	0.72	0.625	0.576923	0.666667	0.565217	-	0.695652	0.695652	0.695652	0.636364	0.695652	0.695652	0.695652
	GGA	0	0	0	0	0.0769231	0	0	-	0	0	0	0	0	0	0
	GGG	0.291667	0.333333	0.28	0.25	0.230769	0.333333	0.304348	-	0.26087	0.26087	0.26087	0.272727	0.26087	0.217391	0.217391

## Sheet: LSMEM1
	Species	Felis_catus	Equus_caballus	Bos_taurus	Rhinolophus_ferrumequinum	Mus_musculus	Canis_lupus	Microcebus_murinus	Galeopterus_variegatus	Callithrix_jacchus	Macaca_mulatta	Nomascus_leucogenys	Pongo_abelii	Gorilla_gorilla	Pan_troglodytes	Homo_sapiens
Amino Acid	Codon	XM_003982967.3	XM_005609318.3	NM_001099718.2	XM_033088044.1	NM_001033437.2	XM_849688.3	XM_012736152.2	XM_008569659.1	XM_002751693.3	XM_001100040.3	XM_004090196.1	XM_002818356.2	XM_004046065.2	XM_001167694.3	NM_182597.2
PHE	UUU	0.75	0.8	0.75	0.333333	0.5	0.4	0.6	0.5	0.714286	0.666667	0.666667	0.666667	0.666667	0.666667	0.666667
	UUC	0.25	0.2	0.25	0.666667	0.5	0.6	0.4	0.5	0.285714	0.333333	0.333333	0.333333	0.333333	0.333333	0.333333
LEU	UUA	0.0588235	0	0	0.0526316	0.111111	0	0.0555556	0.117647	0.0588235	0.111111	0.0526316	0.0526316	0.0526316	0.0526316	0.0526316
	UUG	0	0.125	0.0555556	0	0.0555556	0	0.0555556	0	0	0.0555556	0	0	0	0	0
	CUU	0.117647	0.125	0.111111	0.105263	0.0555556	0.0588235	0.111111	0.176471	0.117647	0.166667	0.157895	0.157895	0.157895	0.157895	0.157895
	CUC	0.235294	0.125	0.166667	0.368421	0.277778	0.235294	0.111111	0.176471	0.117647	0.111111	0.157895	0.157895	0.157895	0.157895	0.157895
	CUA	0.176471	0.25	0.222222	0.105263	0.111111	0.235294	0.222222	0.117647	0.235294	0.277778	0.263158	0.263158	0.263158	0.263158	0.263158
	CUG	0.411765	0.375	0.444444	0.368421	0.388889	0.470588	0.444444	0.411765	0.470588	0.277778	0.368421	0.368421	0.368421	0.368421	0.368421
ILE	AUU	0.272727	0.181818	0.153846	0.222222	0.222222	0.428571	0.454545	0.363636	0.454545	0.4	0.3	0.3	0.3	0.3	0.3
	AUC	0.363636	0.272727	0.615385	0.555556	0.444444	0.142857	0.272727	0.272727	0.181818	0.1	0.3	0.3	0.3	0.3	0.3
	AUA	0.363636	0.545455	0.230769	0.222222	0.333333	0.428571	0.272727	0.363636	0.363636	0.5	0.4	0.4	0.4	0.4	0.4
VAL	GUU	0.333333	0.454545	0.333333	0.272727	0.125	0.111111	0.2	0.25	0.1	0.181818	0.272727	0.181818	0.181818	0.181818	0.181818
	GUC	0.111111	0	0	0.272727	0.25	0.333333	0.3	0.125	0.2	0.181818	0.181818	0.181818	0.181818	0.181818	0.181818
	GUA	0.111111	0.0909091	0.111111	0.0909091	0.125	0.111111	0	0.25	0.1	0.0909091	0.0909091	0.0909091	0.0909091	0.0909091	0.0909091
	GUG	0.444444	0.454545	0.555556	0.363636	0.5	0.444444	0.5	0.375	0.6	0.545455	0.454545	0.545455	0.545455	0.545455	0.545455
SER	UCU	0.0769231	0.230769	0.117647	0.142857	0.4	0.1	0.272727	0.181818	0.2	0.272727	0.272727	0.272727	0.272727	0.272727	0.272727
	UCC	0.230769	0.230769	0.176471	0.214286	0.2	0.3	0.272727	0.272727	0.3	0.181818	0.181818	0.181818	0.181818	0.181818	0.181818
	UCA	0.153846	0.230769	0.235294	0	0.2	0.2	0.0909091	0.181818	0.2	0.181818	0.181818	0.181818	0.181818	0.181818	0.181818
	UCG	0.0769231	0	0	0.357143	0	0.1	0.0909091	0.0909091	0	0.0909091	0.0909091	0.0909091	0.0909091	0.0909091	0.0909091
PRO	CCU	0.75	0.333333	1	0.333333	0	0	0.4	1	0.75	0.333333	0.333333	0.333333	0.333333	0.5	0.333333
	CCC	0	0.333333	0	0.333333	0.333333	0.625	0.2	0	0	0	0	0	0	0	0
	CCA	0.25	0	0	0.333333	0.333333	0	0.2	0	0.25	0.666667	0.666667	0.666667	0.666667	0.5	0.666667
	CCG	0	0.333333	0	0	0.333333	0.375	0.2	0	0	0	0	0	0	0	0
THR	ACU	0.4	0.75	0.5	0	0.2	0.5	0.25	0.5	0.6	0.5	0.6	0.5	0.6	0.6	0.6
	ACC	0.4	0.25	0.5	0.5	0	0.166667	0	0	0	0	0	0	0	0	0
	ACA	0.2	0	0	0.5	0.6	0.333333	0.5	0.5	0.4	0.5	0.4	0.5	0.4	0.4	0.4
	ACG	0	0	0	0	0.2	0	0.25	0	0	0	0	0	0	0	0
ALA	GCU	0.5	0.5	0.25	0.571429	0.666667	0.2	1	0.2	0.666667	0.5	0.333333	0.333333	0.333333	0.333333	0.333333
	GCC	0	0	0.25	0.142857	0.333333	0.6	0	0.4	0	0.25	0.333333	0.333333	0.333333	0.333333	0.333333
	GCA	0.25	0.5	0.5	0.142857	0	0	0	0.2	0.333333	0.25	0.333333	0.333333	0	0.333333	0.333333
	GCG	0.25	0	0	0.142857	0	0.2	0	0.2	0	0	0	0	0.333333	0	0
TYR	UAU	1	1	1	0.5	0	0	1	1	1	1	1	1	1	1	1
	UAC	0	0	0	0.5	1	1	0	0	0	0	0	0	0	0	0
STOP	UAA	1	1	1	0	0	1	1	1	1	1	1	1	1	1	1
	UAG	0	0	0	1	0	0	0	0	0	0	0	0	0	0	0
	UGA	0	0	0	0	1	0	0	0	0	0	0	0	0	0	0
HIS	CAU	0.666667	0.666667	0	0.5	1	0	1	1	1	1	1	1	1	1	1
	CAC	0.333333	0.333333	0	0.5	0	1	0	0	0	0	0	0	0	0	0
GLN	CAA	0.5	0.4	0.142857	0.5	0.285714	0.4	0.2	0.5	0.142857	0.5	0.571429	0.625	0.714286	0.571429	0.571429
	CAG	0.5	0.6	0.857143	0.5	0.714286	0.6	0.8	0.5	0.857143	0.5	0.428571	0.375	0.285714	0.428571	0.428571
ASN	AAU	0.333333	0.3	0.285714	0.142857	0.333333	0.2	0.272727	0.2	0.2	0.3	0.272727	0.272727	0.181818	0.272727	0.272727
	AAC	0.666667	0.7	0.714286	0.857143	0.666667	0.8	0.727273	0.8	0.8	0.7	0.727273	0.727273	0.818182	0.727273	0.727273
LYS	AAA	0.285714	0.375	0.444444	0.285714	0.5	0.142857	0.428571	0.5	0.428571	0.428571	0.428571	0.333333	0.428571	0.428571	0.428571
	AAG	0.714286	0.625	0.555556	0.714286	0.5	0.857143	0.571429	0.5	0.571429	0.571429	0.571429	0.666667	0.571429	0.571429	0.571429
ASP	GAU	0.454545	0.454545	0.636364	0.363636	0.444444	0.3	0.5	0.5	0.636364	0.545455	0.545455	0.545455	0.545455	0.545455	0.545455
	GAC	0.545455	0.545455	0.363636	0.636364	0.555556	0.7	0.5	0.5	0.363636	0.454545	0.454545	0.454545	0.454545	0.454545	0.454545
GLU	GAA	0.5	0.6	0.714286	0	0.571429	0	0.4	0.6	0.75	0.75	0.75	0.75	0.75	0.75	0.75
	GAG	0.5	0.4	0.285714	1	0.428571	1	0.6	0.4	0.25	0.25	0.25	0.25	0.25	0.25	0.25
CYS	UGU	1	1	1	1	0	0.5	1	1	1	1	1	1	1	1	1
	UGC	0	0	0	0	1	0.5	0	0	0	0	0	0	0	0	0
ARG	CGU	0	0.166667	0.142857	0.142857	0	0	0	0	0	0	0	0	0	0	0
	CGC	0	0.166667	0.285714	0.285714	0	0.166667	0	0	0	0	0	0	0	0	0
	CGA	0.5	0.166667	0.285714	0.142857	0	0	0	0	0.2	0.2	0.2	0.2	0.2	0.333333	0.2
	CGG	0	0	0	0	0.333333	0.333333	0.4	0.333333	0.2	0.2	0.2	0.2	0.2	0.166667	0.2
SER	AGU	0.230769	0.0769231	0.117647	0.142857	0.1	0	0.0909091	0.0909091	0.1	0.0909091	0.0909091	0.0909091	0.0909091	0.0909091	0.0909091
	AGC	0.230769	0.230769	0.352941	0.142857	0.1	0.3	0.181818	0.181818	0.2	0.181818	0.181818	0.181818	0.181818	0.181818	0.181818
ARG	AGA	0.5	0.5	0.285714	0.428571	0.333333	0.333333	0.6	0.666667	0.6	0.6	0.6	0.6	0.6	0.5	0.6
	AGG	0	0	0	0	0.333333	0.166667	0	0	0	0	0	0	0	0	0
GLY	GGU	0	0	0	0	0	0.0909091	0.1	0	0	0.1	0.1	0.1	0.1	0.1	0.1
	GGC	0.285714	0.333333	0.166667	0.222222	0.2	0.363636	0.3	0.4	0.3	0.2	0.2	0.2	0.2	0.2	0.2
	GGA	0.571429	0.555556	0.666667	0.666667	0.5	0.272727	0.5	0.5	0.7	0.6	0.6	0.6	0.6	0.6	0.6
	GGG	0.142857	0.111111	0.166667	0.111111	0.3	0.272727	0.1	0.1	0	0.1	0.1	0.1	0.1	0.1	0.1

## Sheet: TMEM38A
	Species	Felis_catus	Equus_caballus	Bos_taurus	Rhinolophus_ferrumequinum	Mus_musculus	Canis_lupus	Microcebus_murinus	Galeopterus_variegatus	Callithrix_jacchus	Macaca_mulatta	Nomascus_leucogenys	Pongo_abelii	Gorilla_gorilla	Pan_troglodytes	Homo_sapiens
Amino Acid	Codon	XM_003982055.4	XM_001499622.6	NM_001083463.1	XM_033134581.1	XM_006509771.3	XM_847645.3	XM_012758373.1	XM_008577575.1	XM_002761867.3	XM_015123230.1	XM_003275800.2	XM_002828869.3	XM_019015951.1	XM_512473.6	NM_024074.2
PHE	UUU	0.238095	0.285714	0.25	0.238095	0.307692	0.142857	0.190476	0.315789	0.142857	0.190476	0.142857	0.294118	0.235294	0.190476	0.190476
	UUC	0.761905	0.714286	0.75	0.761905	0.692308	0.857143	0.809524	0.684211	0.857143	0.809524	0.857143	0.705882	0.764706	0.809524	0.809524
LEU	UUA	0.025	0	0	0	0	0	0	0	0	0	0	0	0	0	0
	UUG	0.075	0.047619	0.025641	0.0769231	0.0714286	0.0769231	0.0512821	0.0322581	0.0789474	0.0789474	0.0526316	0.103448	0.0769231	0.0540541	0.0769231
	CUU	0.05	0	0.128205	0.025641	0.0714286	0.153846	0	0.0322581	0.0263158	0.0263158	0.0263158	0.0344828	0.0384615	0.027027	0.025641
	CUC	0.325	0.380952	0.333333	0.410256	0.178571	0.307692	0.410256	0.290323	0.394737	0.394737	0.368421	0.310345	0.346154	0.405405	0.384615
	CUA	0.05	0.0238095	0.025641	0.025641	0.0714286	0.025641	0.025641	0.0645161	0.0789474	0	0	0	0	0	0
	CUG	0.475	0.547619	0.487179	0.461538	0.607143	0.435897	0.512821	0.580645	0.421053	0.5	0.552632	0.551724	0.538462	0.513514	0.512821
ILE	AUU	0.230769	0.181818	0.133333	0.214286	0.181818	0.142857	0.153846	0.333333	0.133333	0.133333	0.1875	0.214286	0.153846	0.1875	0.125
	AUC	0.615385	0.818182	0.866667	0.714286	0.818182	0.714286	0.769231	0.666667	0.866667	0.866667	0.8125	0.785714	0.846154	0.8125	0.875
	AUA	0.153846	0	0	0.0714286	0	0.142857	0.0769231	0	0	0	0	0	0	0	0
VAL	GUU	0.0434783	0.125	0.136364	0.0434783	0.0909091	0	0	0.0526316	0.05	0	0	0	0	0	0
	GUC	0.521739	0.5	0.363636	0.521739	0.181818	0.545455	0.545455	0.473684	0.4	0.52381	0.45	0.388889	0.4375	0.5	0.5
	GUA	0.0434783	0	0.0454545	0	0	0.136364	0	0.0526316	0.05	0	0.05	0	0	0	0
	GUG	0.391304	0.375	0.454545	0.434783	0.727273	0.318182	0.454545	0.421053	0.5	0.47619	0.5	0.611111	0.5625	0.5	0.5
SER	UCU	0.0689655	0.1	0.030303	0.0357143	0.0869565	0.0322581	0.0714286	0.0416667	0.0714286	0.0714286	0.0689655	0.130435	0.0909091	0.0666667	0.0666667
	UCC	0.482759	0.4	0.393939	0.428571	0.347826	0.451613	0.5	0.541667	0.392857	0.392857	0.37931	0.391304	0.363636	0.366667	0.366667
	UCA	0.0344828	0.0666667	0.0606061	0.0714286	0.0869565	0.0645161	0.0357143	0.0833333	0.0714286	0.107143	0.0689655	0.0869565	0.0909091	0.0666667	0.0666667
	UCG	0.103448	0.0666667	0.151515	0.0714286	0.0434783	0.0967742	0.0714286	0	0.107143	0.107143	0.137931	0.0869565	0.0909091	0.133333	0.133333
PRO	CCU	0.266667	0.142857	0.1875	0.214286	0.272727	0.266667	0.0714286	0.166667	0.133333	0.285714	0.0714286	0.0909091	0.1	0.0714286	0.0714286
	CCC	0.4	0.5	0.5	0.357143	0.181818	0.333333	0.642857	0.5	0.333333	0.285714	0.5	0.545455	0.4	0.5	0.5
	CCA	0.0666667	0.142857	0.25	0.214286	0.454545	0.2	0.142857	0.333333	0.266667	0.357143	0.285714	0.363636	0.4	0.357143	0.357143
	CCG	0.266667	0.214286	0.0625	0.214286	0.0909091	0.2	0.142857	0	0.266667	0.0714286	0.142857	0	0.1	0.0714286	0.0714286
THR	ACU	0.2	0.0909091	0	0.166667	0.222222	0.2	0.2	0.153846	0.1	0.1	0.111111	0.1	0.125	0.125	0.125
	ACC	0.6	0.727273	0.9	0.666667	0.555556	0.6	0.6	0.615385	0.9	0.8	0.777778	0.7	0.75	0.75	0.75
	ACA	0.1	0.181818	0	0.0833333	0.222222	0.1	0.1	0.153846	0	0	0.111111	0.2	0.125	0.125	0.125
	ACG	0.1	0	0.1	0.0833333	0	0.1	0.1	0.0769231	0	0.1	0	0	0	0	0
ALA	GCU	0.0909091	0.1	0.105263	0.173913	0.0625	0.15	0.04	0.0526316	0.125	0.130435	0.130435	0.142857	0.157895	0.125	0.125
	GCC	0.636364	0.6	0.578947	0.565217	0.5625	0.6	0.72	0.578947	0.5	0.565217	0.565217	0.619048	0.684211	0.583333	0.583333
	GCA	0.0909091	0.1	0.210526	0.0434783	0.125	0.15	0.08	0.315789	0.125	0.0869565	0.130435	0.142857	0.0526316	0.125	0.0833333
	GCG	0.181818	0.2	0.105263	0.217391	0.25	0.1	0.16	0.0526316	0.25	0.217391	0.173913	0.0952381	0.105263	0.166667	0.208333
TYR	UAU	0.181818	0.111111	0.2	0.2	0.285714	0.1	0.2	0.222222	0.1	0.2	0.3	0.285714	0.142857	0.2	0.2
	UAC	0.818182	0.888889	0.8	0.8	0.714286	0.9	0.8	0.777778	0.9	0.8	0.7	0.714286	0.857143	0.8	0.8
STOP	UAA	0	0	0	0	0	0	0	0	0	0	0	0	0	0	0
	UAG	1	1	1	1	1	1	1	1	1	1	1	1	1	1	1
	UGA	0	0	0	0	0	0	0	0	0	0	0	0	0	0	0
HIS	CAU	0.388889	0.176471	0.333333	0.105263	0.4	0.388889	0.210526	0.388889	0.411765	0.388889	0.388889	0.333333	0.352941	0.333333	0.333333
	CAC	0.611111	0.823529	0.666667	0.894737	0.6	0.611111	0.789474	0.611111	0.588235	0.611111	0.611111	0.666667	0.647059	0.666667	0.666667
GLN	CAA	0	0	0	0	0	0	0	0	0	0	0	0	0	0	0
	CAG	1	1	1	1	1	1	1	1	1	1	1	1	1	1	1
ASN	AAU	0.5	0	0	0.333333	0	0.4	0	0.285714	0.2	0	0	0	0	0	0
	AAC	0.5	1	1	0.666667	1	0.6	1	0.714286	0.8	1	1	1	1	1	1
LYS	AAA	0.277778	0.294118	0.176471	0.176471	0.0909091	0.235294	0.294118	0.235294	0.235294	0.176471	0.176471	0.1875	0.25	0.176471	0.176471
	AAG	0.722222	0.705882	0.823529	0.823529	0.909091	0.764706	0.705882	0.764706	0.764706	0.823529	0.823529	0.8125	0.75	0.823529	0.823529
ASP	GAU	0.444444	0.333333	0.428571	0.428571	0.25	0.375	0.333333	0.4	0.5	0.375	0.5	0.571429	0.571429	0.5	0.5
	GAC	0.555556	0.666667	0.571429	0.571429	0.75	0.625	0.666667	0.6	0.5	0.625	0.5	0.428571	0.428571	0.5	0.5
GLU	GAA	0	0	0.0769231	0.0769231	0.25	0.0769231	0	0	0	0.0769231	0	0	0	0.153846	0.153846
	GAG	1	1	0.923077	0.923077	0.75	0.923077	1	1	1	0.923077	1	1	1	0.846154	0.846154
CYS	UGU	0.285714	0.125	0.428571	0.571429	0.6	0.285714	0.428571	0.428571	0.375	0.25	0.375	0.222222	0.285714	0.25	0.25
	UGC	0.714286	0.875	0.571429	0.428571	0.4	0.714286	0.571429	0.571429	0.625	0.75	0.625	0.777778	0.714286	0.75	0.75
ARG	CGU	0	0	0	0	0	0	0	0	0	0	0	0	0	0	0
	CGC	0.25	0.375	0.285714	0.375	0.4	0.25	0.375	0.375	0.375	0.375	0.375	0.428571	0.4	0.375	0.375
	CGA	0.25	0.125	0.142857	0.125	0	0.25	0.125	0.25	0.25	0.25	0.25	0.285714	0.4	0.25	0.25
	CGG	0.25	0.25	0.285714	0.375	0.4	0.25	0.25	0.125	0.25	0.25	0.25	0.142857	0	0.25	0.25
SER	AGU	0.0344828	0.0333333	0.0909091	0.178571	0.173913	0.0967742	0.0357143	0.125	0.0714286	0.0714286	0.0344828	0	0.0454545	0.0666667	0.0333333
	AGC	0.275862	0.333333	0.272727	0.214286	0.26087	0.258065	0.285714	0.208333	0.285714	0.25	0.310345	0.304348	0.318182	0.3	0.333333
ARG	AGA	0.125	0.125	0.142857	0	0	0.125	0.125	0	0	0	0.125	0	0	0	0
	AGG	0.125	0.125	0.142857	0.125	0.2	0.125	0.125	0.25	0.125	0.125	0	0.142857	0.2	0.125	0.125
GLY	GGU	0.08	0.136364	0.190476	0.166667	0.0588235	0.136364	0.166667	0.0434783	0.238095	0.304348	0.304348	0.318182	0.3	0.318182	0.318182
	GGC	0.48	0.409091	0.285714	0.375	0.352941	0.409091	0.333333	0.391304	0.238095	0.173913	0.217391	0.181818	0.2	0.181818	0.181818
	GGA	0.08	0.0909091	0.142857	0.166667	0.411765	0.0909091	0.166667	0.217391	0.190476	0.130435	0.130435	0.136364	0.1	0.136364	0.136364
	GGG	0.36	0.363636	0.380952	0.291667	0.176471	0.363636	0.333333	0.347826	0.333333	0.391304	0.347826	0.363636	0.4	0.363636	0.363636

## Sheet: RPL3L
	Species	Felis_catus	Equus_caballus	Bos_taurus	Rhinolophus_ferrumequinum	Mus_musculus	Canis_lupus	Microcebus_murinus	Galeopterus_variegatus	Callithrix_jacchus	Macaca_mulatta	Nomascus_leucogenys	Pongo_abelii	Gorilla_gorilla	Pan_troglodytes	Homo_sapiens
Amino Acid	Codon	XM_003998948.5	XM_001497904.5	NM_001035501.1	XM_033101692.1	XM_017317609.1	XM_014114440.1	XM_012743514.2	XM_008581621.1	XM_009008977.2	XM_015125331.1	XM_003269146.1	XM_003778541.2	XM_004056977.2	XM_009430079.2	NM_005061.2
PHE	UUU	0.1875	0.0625	0.1875	0.125	0.461538	0.1875	0.1875	0.176471	0.125	0.1875	0.125	0.1875	0.117647	0.117647	0.117647
	UUC	0.8125	0.9375	0.8125	0.875	0.538462	0.8125	0.8125	0.823529	0.875	0.8125	0.875	0.8125	0.882353	0.882353	0.882353
LEU	UUA	0	0	0	0	0.0454545	0	0	0	0.0357143	0	0	0	0	0	0
	UUG	0	0.037037	0.0740741	0.142857	0.136364	0	0	0.125	0	0.0714286	0.04	0.115385	0.0384615	0.04	0.0384615
	CUU	0.0740741	0.037037	0	0.0357143	0.136364	0.0454545	0.037037	0	0.0357143	0	0	0	0	0	0
	CUC	0.222222	0.222222	0.259259	0.285714	0.136364	0.25	0.296296	0.25	0.214286	0.25	0.28	0.192308	0.269231	0.28	0.269231
	CUA	0.037037	0	0	0	0	0.0909091	0.148148	0	0.0714286	0.0357143	0.04	0.0384615	0.0769231	0.08	0.0769231
	CUG	0.666667	0.703704	0.666667	0.535714	0.545455	0.613636	0.518519	0.625	0.642857	0.642857	0.64	0.653846	0.615385	0.6	0.615385
ILE	AUU	0.388889	0.5	0.315789	0.368421	0.578947	0.4	0.526316	0.55	0.555556	0.555556	0.666667	0.647059	0.666667	0.666667	0.666667
	AUC	0.611111	0.5	0.684211	0.578947	0.421053	0.6	0.421053	0.4	0.444444	0.444444	0.333333	0.352941	0.333333	0.333333	0.333333
	AUA	0	0	0	0.0526316	0	0	0.0526316	0.05	0	0	0	0	0	0	0
VAL	GUU	0.0285714	0	0.0606061	0.0625	0.0967742	0.0731707	0	0	0.0909091	0	0	0	0	0.0294118	0
	GUC	0.371429	0.371429	0.30303	0.3125	0.193548	0.317073	0.40625	0.342857	0.212121	0.294118	0.285714	0.323529	0.294118	0.294118	0.294118
	GUA	0	0	0.030303	0.03125	0.16129	0.0243902	0.03125	0.0857143	0	0.0294118	0.0285714	0.0294118	0.0294118	0.0294118	0.0294118
	GUG	0.6	0.628571	0.606061	0.59375	0.548387	0.585366	0.5625	0.571429	0.69697	0.676471	0.685714	0.647059	0.676471	0.647059	0.676471
SER	UCU	0.0454545	0	0.0526316	0.15	0.133333	0.0322581	0	0.05	0.05	0	0.05	0.111111	0	0	0
	UCC	0.318182	0.333333	0.368421	0.25	0.2	0.354839	0.318182	0.35	0.35	0.428571	0.35	0.222222	0.4	0.4	0.4
	UCA	0	0	0	0	0.0666667	0	0.0454545	0	0	0	0	0	0	0	0
	UCG	0.0909091	0.0952381	0.0526316	0.05	0	0.129032	0.0909091	0	0.05	0.047619	0.05	0.0555556	0.05	0.05	0.05
PRO	CCU	0.375	0.235294	0.235294	0.411765	0.166667	0.208333	0.235294	0.117647	0.235294	0.15	0.111111	0.105263	0.111111	0.157895	0.111111
	CCC	0.25	0.411765	0.352941	0.294118	0.416667	0.3125	0.411765	0.411765	0.294118	0.45	0.5	0.473684	0.5	0.421053	0.5
	CCA	0.125	0.176471	0.0588235	0.176471	0.166667	0.1875	0	0.176471	0.235294	0.1	0.111111	0.0526316	0.0555556	0	0
	CCG	0.25	0.176471	0.352941	0.117647	0.25	0.291667	0.352941	0.294118	0.235294	0.3	0.277778	0.368421	0.333333	0.421053	0.388889
THR	ACU	0.153846	0.12	0.08	0.08	0.173913	0.133333	0.08	0.08	0.0384615	0.037037	0.0769231	0.0833333	0.0740741	0.0714286	0.0740741
	ACC	0.384615	0.4	0.44	0.52	0.565217	0.566667	0.6	0.6	0.461538	0.444444	0.461538	0.5	0.481481	0.5	0.481481
	ACA	0	0.2	0.12	0.16	0.173913	0.166667	0.16	0.12	0.230769	0.185185	0.230769	0.25	0.185185	0.178571	0.185185
	ACG	0.461538	0.28	0.36	0.24	0.0869565	0.133333	0.16	0.2	0.269231	0.333333	0.230769	0.166667	0.259259	0.25	0.259259
ALA	GCU	0.192308	0.230769	0.0740741	0.230769	0.304348	0.122449	0.16	0.12	0.148148	0.111111	0.148148	0.137931	0.111111	0.111111	0.111111
	GCC	0.653846	0.615385	0.740741	0.653846	0.478261	0.612245	0.68	0.64	0.666667	0.740741	0.703704	0.689655	0.740741	0.740741	0.740741
	GCA	0.0769231	0	0.111111	0.0769231	0.130435	0.122449	0.08	0.16	0.0740741	0.0740741	0.0740741	0.103448	0.0740741	0.111111	0.0740741
	GCG	0.0769231	0.153846	0.0740741	0.0384615	0.0869565	0.142857	0.08	0.08	0.111111	0.0740741	0.0740741	0.0689655	0.0740741	0.037037	0.0740741
TYR	UAU	0.125	0.125	0.125	0.5	0.142857	0	0.375	0.5	0.125	0.25	0.25	0.25	0.428571	0.428571	0.142857
	UAC	0.875	0.875	0.875	0.5	0.857143	1	0.625	0.5	0.875	0.75	0.75	0.75	0.571429	0.571429	0.857143
STOP	UAA	0	0	0	0	1	0	0	0	0	0	0	0	0	0	0
	UAG	1	1	1	1	0	1	1	1	1	1	1	1	1	1	1
	UGA	0	0	0	0	0	0	0	0	0	0	0	0	0	0	0
HIS	CAU	0.0833333	0.208333	0.28	0.166667	0.111111	0.148148	0.0833333	0.208333	0.208333	0.166667	0.208333	0.227273	0.24	0.2	0.24
	CAC	0.916667	0.791667	0.72	0.833333	0.888889	0.851852	0.916667	0.791667	0.791667	0.833333	0.791667	0.772727	0.76	0.8	0.76
GLN	CAA	0.0714286	0.0769231	0.142857	0.0769231	0.0833333	0.176471	0	0.266667	0.142857	0.142857	0.142857	0.153846	0.214286	0.214286	0.214286
	CAG	0.928571	0.923077	0.857143	0.923077	0.916667	0.823529	1	0.733333	0.857143	0.857143	0.857143	0.846154	0.785714	0.785714	0.785714
ASN	AAU	0.428571	0.571429	0.25	0.666667	0.375	0.333333	0.285714	0.428571	0.428571	0.428571	0.285714	0.166667	0.285714	0.428571	0.285714
	AAC	0.571429	0.428571	0.75	0.333333	0.625	0.666667	0.714286	0.571429	0.571429	0.571429	0.714286	0.833333	0.714286	0.571429	0.714286
LYS	AAA	0.145833	0.0816327	0.14	0.156863	0.204545	0.14	0.122449	0.14	0.14	0.18	0.14	0.163265	0.122449	0.122449	0.122449
	AAG	0.854167	0.918367	0.86	0.843137	0.795455	0.86	0.877551	0.86	0.86	0.82	0.86	0.836735	0.877551	0.877551	0.877551
ASP	GAU	0.153846	0.307692	0.142857	0.285714	0.272727	0.133333	0.142857	0.428571	0.461538	0.307692	0.153846	0.153846	0.153846	0.153846	0.230769
	GAC	0.846154	0.692308	0.857143	0.714286	0.727273	0.866667	0.857143	0.571429	0.538462	0.692308	0.846154	0.846154	0.846154	0.846154	0.769231
GLU	GAA	0.238095	0.2	0.1	0.25	0.25	0.333333	0.105263	0.263158	0.2	0.227273	0.2	0.263158	0.2	0.2	0.2
	GAG	0.761905	0.8	0.9	0.75	0.75	0.666667	0.894737	0.736842	0.8	0.772727	0.8	0.736842	0.8	0.8	0.8
CYS	UGU	0	0	0.166667	0	0.142857	0.0769231	0	0	0	0.142857	0.166667	0.2	0.166667	0.166667	0.166667
	UGC	1	1	0.833333	1	0.857143	0.923077	1	1	1	0.857143	0.833333	0.8	0.833333	0.833333	0.833333
ARG	CGU	0.0555556	0	0.0606061	0.0571429	0.0357143	0.0701754	0	0.0909091	0.0882353	0.0285714	0.0588235	0	0	0	0
	CGC	0.277778	0.314286	0.30303	0.228571	0.214286	0.315789	0.277778	0.242424	0.205882	0.257143	0.235294	0.264706	0.242424	0.235294	0.242424
	CGA	0.0833333	0.0571429	0	0.0857143	0.214286	0.105263	0.0555556	0.030303	0.0882353	0.114286	0.0882353	0.0882353	0.0909091	0.0882353	0.0909091
	CGG	0.388889	0.485714	0.484848	0.485714	0.285714	0.333333	0.5	0.515152	0.470588	0.4	0.5	0.470588	0.515152	0.5	0.515152
SER	AGU	0.0909091	0.0952381	0.105263	0.2	0.2	0.0967742	0.0909091	0.1	0.1	0.0952381	0.1	0.111111	0.15	0.15	0.15
	AGC	0.454545	0.47619	0.421053	0.35	0.4	0.387097	0.454545	0.5	0.45	0.428571	0.45	0.5	0.4	0.4	0.4
ARG	AGA	0.0555556	0	0	0.0571429	0.107143	0.0350877	0.0833333	0.030303	0.0294118	0.0571429	0.0294118	0.0294118	0.030303	0.0294118	0.030303
	AGG	0.138889	0.142857	0.151515	0.0857143	0.142857	0.140351	0.0833333	0.0909091	0.117647	0.142857	0.0882353	0.147059	0.121212	0.147059	0.121212
GLY	GGU	0.0645161	0.151515	0.125	0.125	0.259259	0.0847458	0.15625	0.151515	0.1875	0.21875	0.21875	0.176471	0.1875	0.205882	0.1875
	GGC	0.645161	0.545455	0.625	0.46875	0.444444	0.474576	0.5625	0.545455	0.59375	0.5	0.5	0.529412	0.5625	0.5	0.5625
	GGA	0.0645161	0.0606061	0.09375	0.21875	0.148148	0.0847458	0.09375	0.0606061	0.09375	0.0625	0.0625	0.0588235	0.125	0.0588235	0.0625
	GGG	0.225806	0.242424	0.15625	0.1875	0.148148	0.355932	0.1875	0.242424	0.125	0.21875	0.21875	0.235294	0.125	0.235294	0.1875

## Sheet: MYH1
	Species	Felis_catus	Equus_caballus	Bos_taurus	Rhinolophus_ferrumequinum	Mus_musculus	Canis_lupus	Microcebus_murinus	Galeopterus_variegatus	Callithrix_jacchus	Macaca_mulatta	Nomascus_leucogenys	Pongo_abelii	Gorilla_gorilla	Pan_troglodytes	Homo_sapiens
Amino Acid	Codon	-	XM_005597036.3	XM_024979592.1	-	XM_017314318.1	XM_005619467.2	XM_012777751.2	-	XM_002747909.4	XM_015118485.1	XM_003274683.1	XM_002827032.1	XM_019013360.1	-	NM_005963.3
PHE	UUU	-	0.25	0.303571	-	0.339623	0.321429	0.381818	-	0.346154	0.310345	0.350877	0.350877	0.375	-	0.392857
	UUC	-	0.75	0.696429	-	0.660377	0.678571	0.618182	-	0.653846	0.689655	0.649123	0.649123	0.625	-	0.607143
LEU	UUA	-	0.0310881	0.0263158	-	0.026178	0.0364583	0.0260417	-	0.0263158	0.0260417	0.03125	0.03125	0.0209424	-	0.0209424
	UUG	-	0.0621762	0.0631579	-	0.0575916	0.0364583	0.0677083	-	0.0789474	0.0833333	0.0677083	0.0833333	0.0942408	-	0.0890052
	CUU	-	0.119171	0.0894737	-	0.078534	0.130208	0.151042	-	0.126316	0.114583	0.114583	0.119792	0.115183	-	0.120419
	CUC	-	0.181347	0.178947	-	0.188482	0.182292	0.161458	-	0.184211	0.208333	0.192708	0.192708	0.198953	-	0.193717
	CUA	-	0.0466321	0.0894737	-	0.0314136	0.109375	0.0677083	-	0.0736842	0.0833333	0.078125	0.078125	0.0942408	-	0.0890052
	CUG	-	0.559585	0.552632	-	0.617801	0.505208	0.526042	-	0.510526	0.484375	0.515625	0.494792	0.47644	-	0.486911
ILE	AUU	-	0.295918	0.28125	-	0.23	0.317308	0.25	-	0.31068	0.32	0.355769	0.323529	0.349515	-	0.359223
	AUC	-	0.642857	0.677083	-	0.73	0.625	0.71	-	0.640777	0.65	0.605769	0.627451	0.601942	-	0.601942
	AUA	-	0.0612245	0.0416667	-	0.04	0.0576923	0.04	-	0.0485437	0.03	0.0384615	0.0490196	0.0485437	-	0.038835
VAL	GUU	-	0.164706	0.148148	-	0.114943	0.107143	0.192771	-	0.192771	0.209302	0.243902	0.235294	0.22619	-	0.22619
	GUC	-	0.317647	0.283951	-	0.298851	0.380952	0.301205	-	0.289157	0.267442	0.219512	0.247059	0.25	-	0.25
	GUA	-	0.117647	0.111111	-	0.091954	0.0595238	0.0722892	-	0.0361446	0.0465116	0.0365854	0.0470588	0.0238095	-	0.0238095
	GUG	-	0.4	0.45679	-	0.494253	0.452381	0.433735	-	0.481928	0.476744	0.5	0.470588	0.5	-	0.5
SER	UCU	-	0.231579	0.290323	-	0.252525	0.255319	0.234694	-	0.244898	0.25	0.265957	0.255319	0.265957	-	0.255319
	UCC	-	0.263158	0.236559	-	0.30303	0.255319	0.295918	-	0.27551	0.28125	0.265957	0.265957	0.255319	-	0.265957
	UCA	-	0.136842	0.139785	-	0.10101	0.0957447	0.0816327	-	0.102041	0.09375	0.106383	0.106383	0.106383	-	0.106383
	UCG	-	0	0	-	0.020202	0.0106383	0.0204082	-	0.0102041	0.0104167	0	0.0106383	0.0106383	-	0.0106383
PRO	CCU	-	0.363636	0.30303	-	0.275862	0.1	0.266667	-	0.3	0.290323	0.354839	0.333333	0.354839	-	0.354839
	CCC	-	0.393939	0.454545	-	0.517241	0.533333	0.533333	-	0.5	0.516129	0.451613	0.466667	0.451613	-	0.451613
	CCA	-	0.151515	0.212121	-	0.137931	0.3	0.133333	-	0.133333	0.129032	0.193548	0.2	0.193548	-	0.193548
	CCG	-	0.0909091	0.030303	-	0.0689655	0.0666667	0.0666667	-	0.0666667	0.0645161	0	0	0	-	0
THR	ACU	-	0.298969	0.316327	-	0.244681	0.27	0.268041	-	0.291667	0.216495	0.27451	0.247525	0.264706	-	0.267327
	ACC	-	0.402062	0.346939	-	0.414894	0.38	0.381443	-	0.34375	0.43299	0.372549	0.39604	0.392157	-	0.386139
	ACA	-	0.216495	0.214286	-	0.202128	0.24	0.257732	-	0.322917	0.268041	0.284314	0.29703	0.284314	-	0.29703
	ACG	-	0.0824742	0.122449	-	0.138298	0.11	0.0927835	-	0.0416667	0.0824742	0.0686275	0.0594059	0.0588235	-	0.049505
ALA	GCU	-	0.300578	0.264706	-	0.273256	0.263158	0.323699	-	0.34104	0.354286	0.360465	0.364162	0.352941	-	0.350877
	GCC	-	0.450867	0.482353	-	0.476744	0.438596	0.427746	-	0.410405	0.411429	0.395349	0.404624	0.417647	-	0.421053
	GCA	-	0.16763	0.194118	-	0.180233	0.210526	0.196532	-	0.208092	0.2	0.215116	0.213873	0.205882	-	0.192982
	GCG	-	0.0809249	0.0588235	-	0.0697674	0.0877193	0.0520231	-	0.0404624	0.0342857	0.0290698	0.017341	0.0235294	-	0.0350877
TYR	UAU	-	0.333333	0.390244	-	0.434783	0.380952	0.409091	-	0.425532	0.487179	0.45	0.5	0.487805	-	0.512195
	UAC	-	0.666667	0.609756	-	0.565217	0.619048	0.590909	-	0.574468	0.512821	0.55	0.5	0.512195	-	0.487805
STOP	UAA	-	1	0	-	0	0	1	-	1	1	1	1	1	-	1
	UAG	-	0	1	-	0	0	0	-	0	0	0	0	0	-	0
	UGA	-	0	0	-	1	1	0	-	0	0	0	0	0	-	0
HIS	CAU	-	0.307692	0.228571	-	0.263158	0.289474	0.27027	-	0.405405	0.351351	0.432432	0.394737	0.473684	-	0.513514
	CAC	-	0.692308	0.771429	-	0.736842	0.710526	0.72973	-	0.594595	0.648649	0.567568	0.605263	0.526316	-	0.486486
GLN	CAA	-	0.224806	0.193798	-	0.178295	0.215385	0.294574	-	0.315385	0.307692	0.323077	0.315385	0.307692	-	0.315385
	CAG	-	0.775194	0.806202	-	0.821705	0.784615	0.705426	-	0.684615	0.692308	0.676923	0.684615	0.692308	-	0.684615
ASN	AAU	-	0.421053	0.347222	-	0.278481	0.376623	0.371795	-	0.376623	0.394737	0.407895	0.407895	0.407895	-	0.407895
	AAC	-	0.578947	0.652778	-	0.721519	0.623377	0.628205	-	0.623377	0.605263	0.592105	0.592105	0.592105	-	0.592105
LYS	AAA	-	0.283654	0.2657	-	0.287081	0.302885	0.315789	-	0.311005	0.333333	0.333333	0.325359	0.336538	-	0.336538
	AAG	-	0.716346	0.7343	-	0.712919	0.697115	0.684211	-	0.688995	0.666667	0.666667	0.674641	0.663462	-	0.663462
ASP	GAU	-	0.41	0.4375	-	0.367347	0.377551	0.377551	-	0.469388	0.42268	0.459184	0.447917	0.459184	-	0.489796
	GAC	-	0.59	0.5625	-	0.632653	0.622449	0.622449	-	0.530612	0.57732	0.540816	0.552083	0.540816	-	0.510204
GLU	GAA	-	0.384615	0.332046	-	0.272031	0.333333	0.417625	-	0.421456	0.416031	0.421456	0.418251	0.413793	-	0.421456
	GAG	-	0.615385	0.667954	-	0.727969	0.666667	0.582375	-	0.578544	0.583969	0.578544	0.581749	0.586207	-	0.578544
CYS	UGU	-	0.294118	0.352941	-	0.1875	0.5	0.4375	-	0.5625	0.588235	0.529412	0.529412	0.470588	-	0.470588
	UGC	-	0.705882	0.647059	-	0.8125	0.5	0.5625	-	0.4375	0.411765	0.470588	0.470588	0.529412	-	0.529412
ARG	CGU	-	0.0576923	0.108911	-	0.0582524	0.0769231	0.0769231	-	0.0865385	0.0784314	0.0784314	0.0882353	0.0873786	-	0.0673077
	CGC	-	0.211538	0.227723	-	0.223301	0.221154	0.211538	-	0.201923	0.205882	0.22549	0.196078	0.194175	-	0.221154
	CGA	-	0.0576923	0.039604	-	0.0291262	0.0288462	0.0480769	-	0.0480769	0.0392157	0.0588235	0.0588235	0.0582524	-	0.0576923
	CGG	-	0.163462	0.108911	-	0.174757	0.144231	0.173077	-	0.173077	0.166667	0.147059	0.156863	0.135922	-	0.134615
SER	AGU	-	0.157895	0.129032	-	0.0909091	0.159574	0.183673	-	0.163265	0.177083	0.148936	0.159574	0.159574	-	0.159574
	AGC	-	0.210526	0.204301	-	0.232323	0.223404	0.183673	-	0.204082	0.1875	0.212766	0.202128	0.202128	-	0.202128
ARG	AGA	-	0.211538	0.178218	-	0.203883	0.211538	0.201923	-	0.211538	0.205882	0.205882	0.196078	0.184466	-	0.182692
	AGG	-	0.298077	0.336634	-	0.31068	0.317308	0.288462	-	0.278846	0.303922	0.284314	0.303922	0.339806	-	0.336538
GLY	GGU	-	0.236111	0.225352	-	0.146667	0.178082	0.214286	-	0.27027	0.242857	0.28169	0.28169	0.277778	-	0.277778
	GGC	-	0.305556	0.323944	-	0.36	0.30137	0.3	-	0.27027	0.242857	0.253521	0.253521	0.25	-	0.25
	GGA	-	0.194444	0.126761	-	0.186667	0.150685	0.2	-	0.189189	0.2	0.183099	0.211268	0.194444	-	0.194444
	GGG	-	0.263889	0.323944	-	0.306667	0.369863	0.285714	-	0.27027	0.314286	0.28169	0.253521	0.277778	-	0.277778
